# Supplementary material for: Efficacy of two artemisinin-based combinations for the treatment of malaria in pregnancy in India: a randomized controlled trial
Source: Springer Nature journal article supplement (doi:10.1186/s12936-018-2393-3), 2018-07-04

# Kaplan-Meier failure estimates

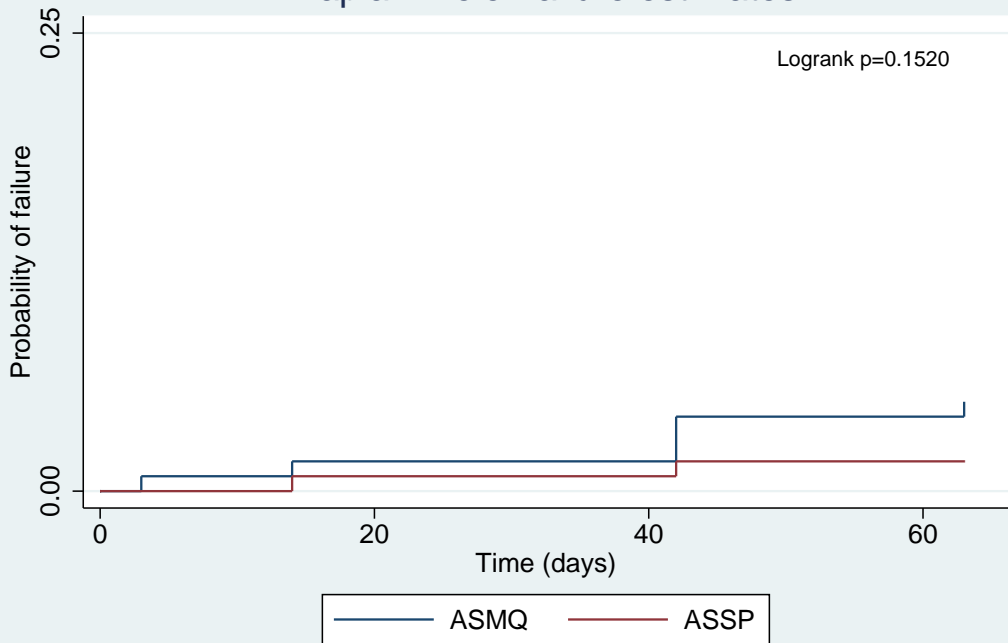

Supplement: MOESM1 [file 15908246]
